# Supplementary material
Source: PubMed Central journal article supplement (PMC4677772)

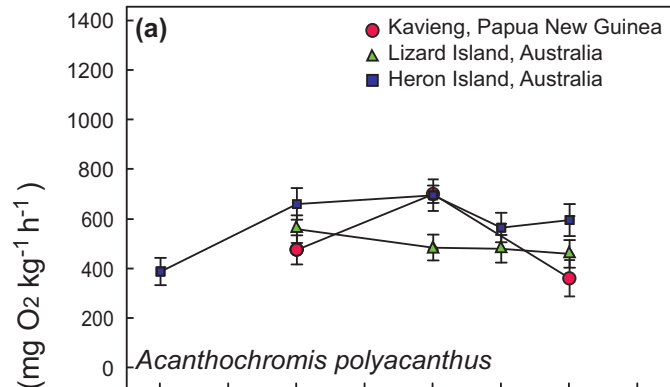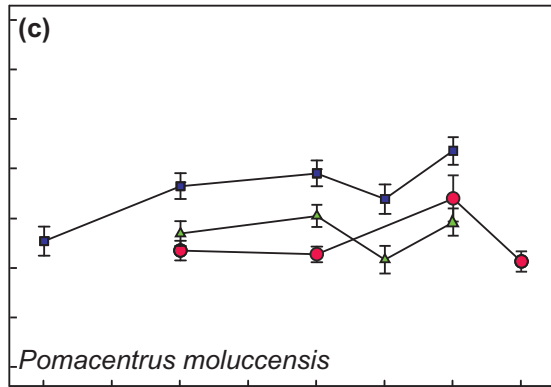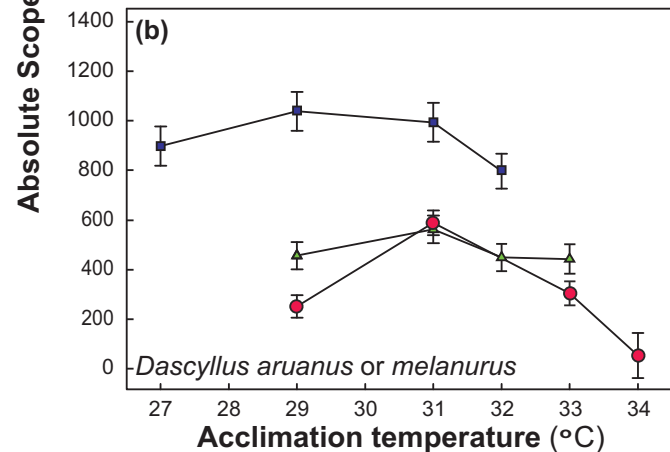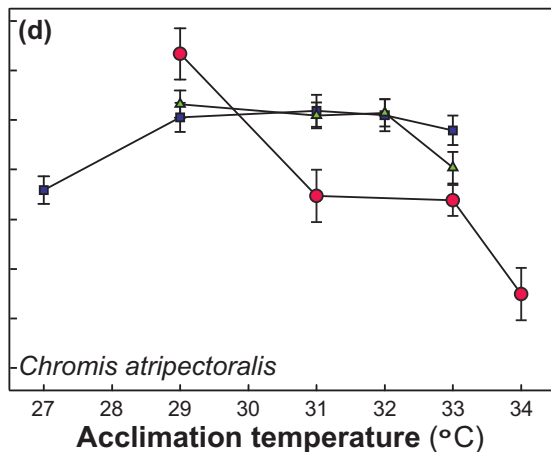

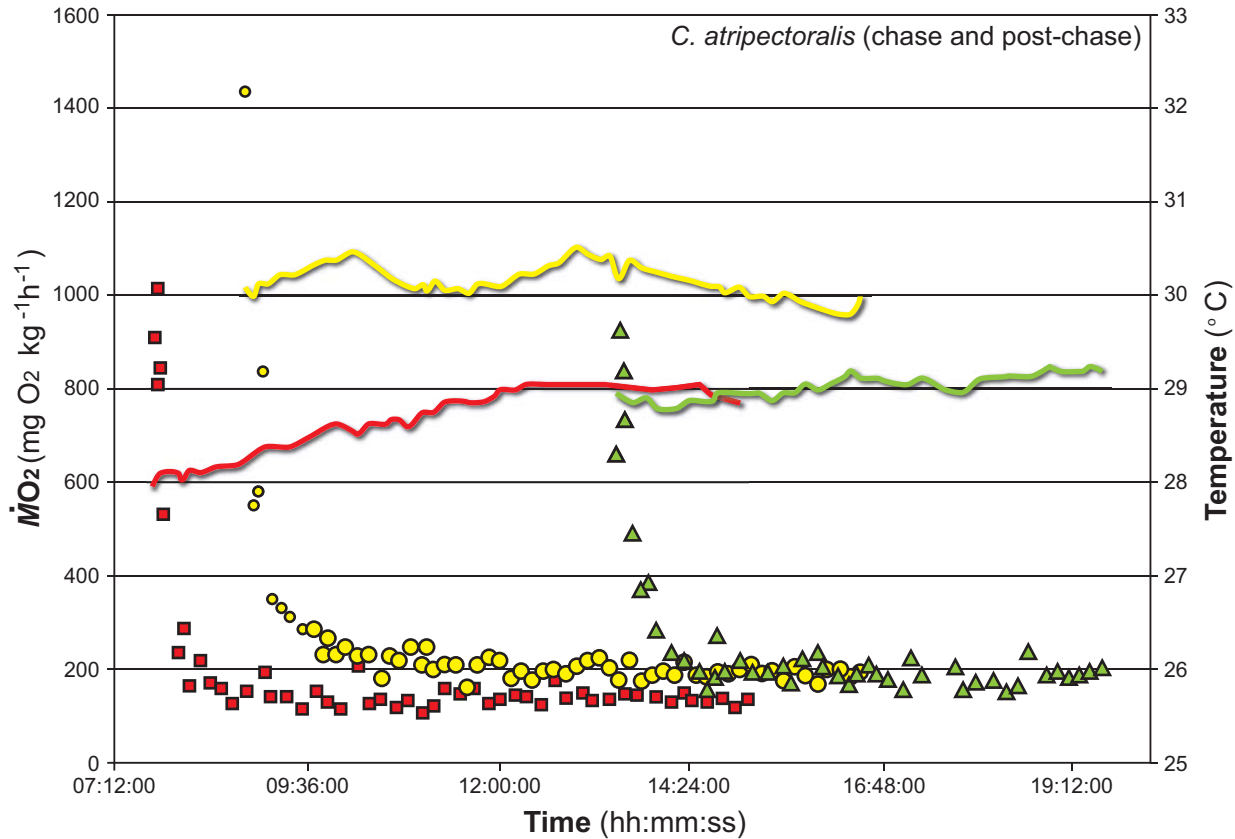

Supplement: NIHMS686317-supplement-Supp_FigureS1-S2.pdf [file NIHMS686317-supplement-Supp_FigureS1-S2.pdf]
